# Supplementary material for: Investigation of Hardness and Microanalysis of Sintered Aluminum-Based Supplemented Metal Matrix Machined Composites
Source: MDPI journal article supplement (doi:10.3390/cryst13091347), 2023-09-04
Supplement: s1 [file s1]

Table S1: Designed ratio of reinforcements alongwith the selected sintering temperature and sintering time in sintering furnace

| sample                      | Nature of composite | Sampling | Silicon Carbide SiC (37~45µm) (Percentage Wt %) | Zirconium silicate ZrSiO <sub>4</sub> (< 50 nm) (Percentage Wt %) | SiC+ZrSiO <sub>4</sub> (Percentage Wt %) | Sintering Temperature (°C) | Sintering Time (Min) |
|-----------------------------|---------------------|----------|-------------------------------------------------|-------------------------------------------------------------------|------------------------------------------|----------------------------|----------------------|
| Al-SiC                      | Binary              | S1       | 5                                               | -                                                                 | -                                        | 500                        | 60                   |
|                             |                     | S2       | 20                                              | -                                                                 | -                                        | 700                        | 45                   |
|                             |                     | S3       | 30                                              | -                                                                 | -                                        | 900                        | 30                   |
|                             |                     | S4       | 40                                              | -                                                                 | -                                        | 1100                       | 15                   |
| Al- ZrSiO <sub>4</sub>      | Binary              | S5       | -                                               | 5                                                                 | -                                        | 500                        | 60                   |
|                             |                     | S6       | -                                               | 20                                                                | -                                        | 700                        | 45                   |
|                             |                     | S7       | -                                               | 30                                                                | -                                        | 900                        | 30                   |
|                             |                     | S8       | -                                               | 40                                                                | -                                        | 1100                       | 15                   |
| Al- SiC- ZrSiO <sub>4</sub> | Hybrid              | S9       | 5                                               | 40                                                                | 5+40                                     | 500                        | 60                   |
|                             |                     | S10      | 20                                              | 30                                                                | 20+30                                    | 700                        | 45                   |
|                             |                     | S11      | 30                                              | 20                                                                | 30+20                                    | 900                        | 30                   |
|                             |                     | S12      | 40                                              | 5                                                                 | 40+5                                     | 1100                       | 15                   |

## MORPHOLOGICAL STUDY COMPOSITES MACHINED

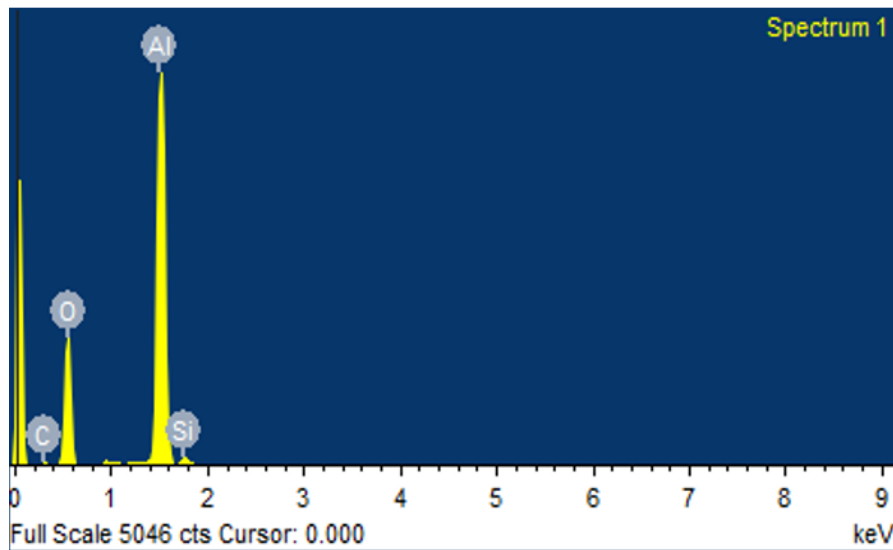

Figure S1 EDS spectrum of AMMC containing 20% SiC as reinforcement.

Table S2 Elements present in sample S1 containing 20% SiC as reinforcement.

| Elements | Weight% | Atomic% |
|----------|---------|---------|
| Al       | 44.98   | 32.44   |
| Si       | 1.71    | 1.18    |
| C        | 3.77    | 6.11    |
| O        | 49.54   | 60.27   |

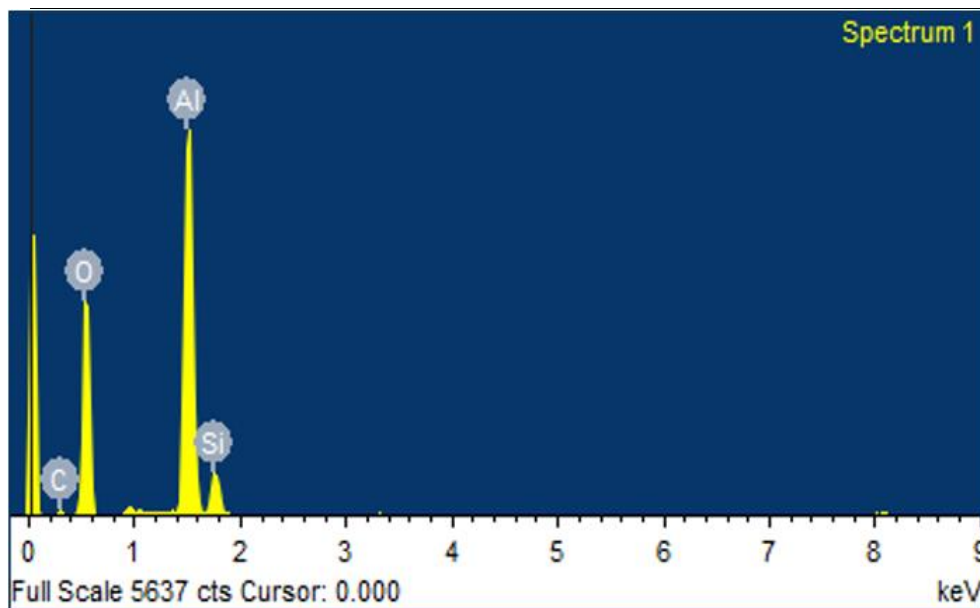

**Figure S2** EDS spectrum of sample S3 containing 30% SiC as reinforcement.

**Table S3** List of elements in AMMC containing 30% SiC as reinforcement.

| Elements | Weight% | Atomic% |
|----------|---------|---------|
| Al       | 32.5    | 22.4    |
| Si       | 5.4     | 3.6     |
| C        | 5.6     | 8.6     |
| O        | 56.5    | 65.4    |

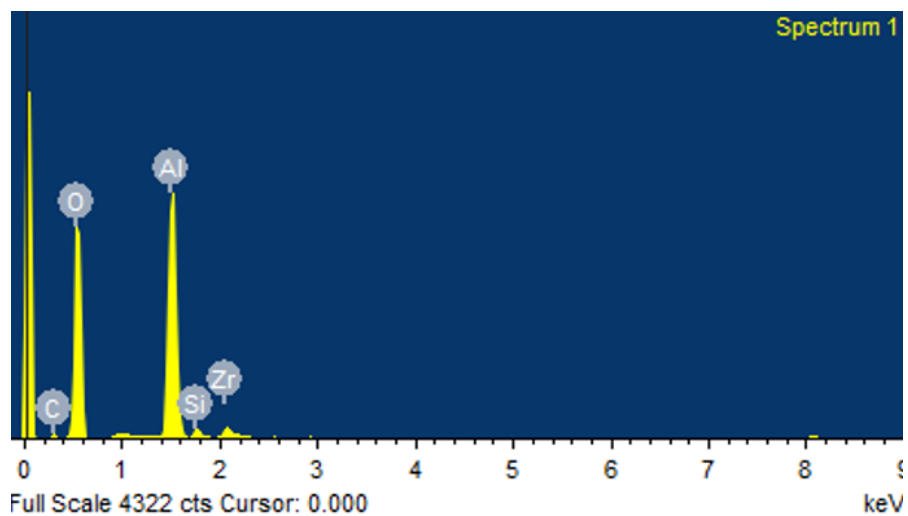

**Figure S3** EDS spectrum of sample S4 containing 40% SiC as reinforcement.

**Table S4** List of elements in AMMC containing 40% SiC as reinforcement.

| Elements | Weight% | Atomic% |
|----------|---------|---------|
| Al       | 26.4    | 17.9    |
| Si       | 4.8     | 1.5     |
| C        | 5.0     | 7.6     |
| O        | 63.8    | 73.0    |

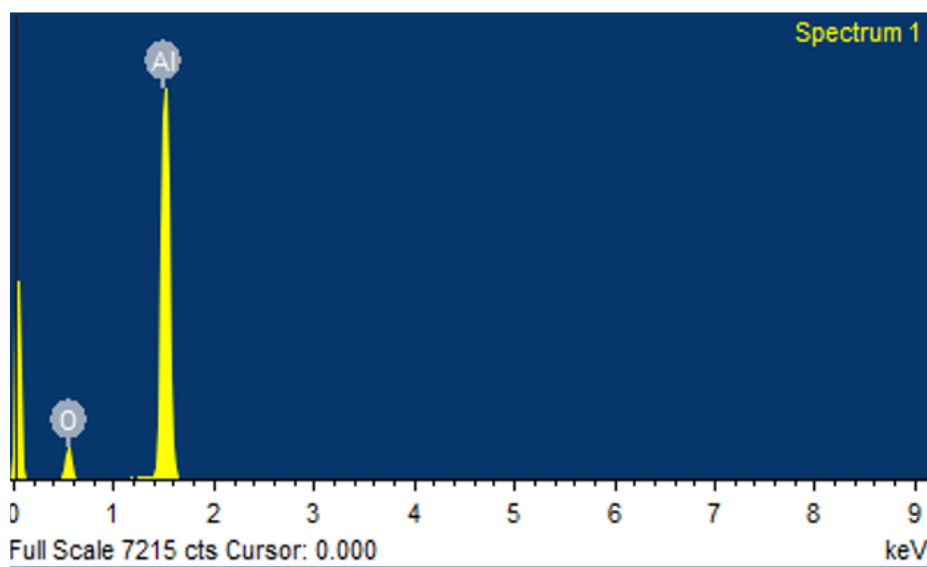

**Figure S4.** No text of specified style in document. EDS spectrum of sample S4 containing 20% ZrSiO<sub>4</sub> as reinforcement.

**Table S5** List of elements in AMMC containing 20% ZrSiO<sub>4</sub> as reinforcement.

| Elements | Weight% | Atomic% |
|----------|---------|---------|
| Al       | 23.38   | 20.88   |
| Si       | 12.02   | 10.35   |
| C        | 7.20    | 14.47   |
| O        | 31.5    | 47.5    |
| Zr       | 25.9    | 6.8     |

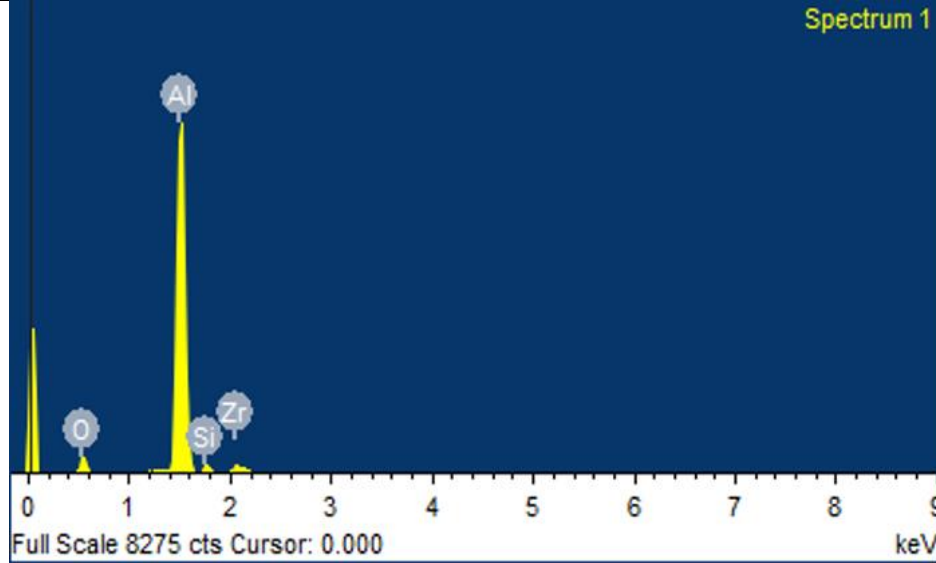

**Figure S5** EDS spectrum of sample S4 containing 30% ZrSiO<sub>4</sub> as reinforcement.

**Table S6** List of elements in AMMC containing 30% ZrSiO<sub>4</sub> as reinforcement.

| Elements | Weight% | Atomic% |
|----------|---------|---------|
| Al       | 63.17   | 54.12   |
| Si       | 2.77    | 2.28    |
| C        | 7.46    | 14.40   |
| O        | 18.8    | 27.2    |
| Zr       | 7.8     | 2.0     |

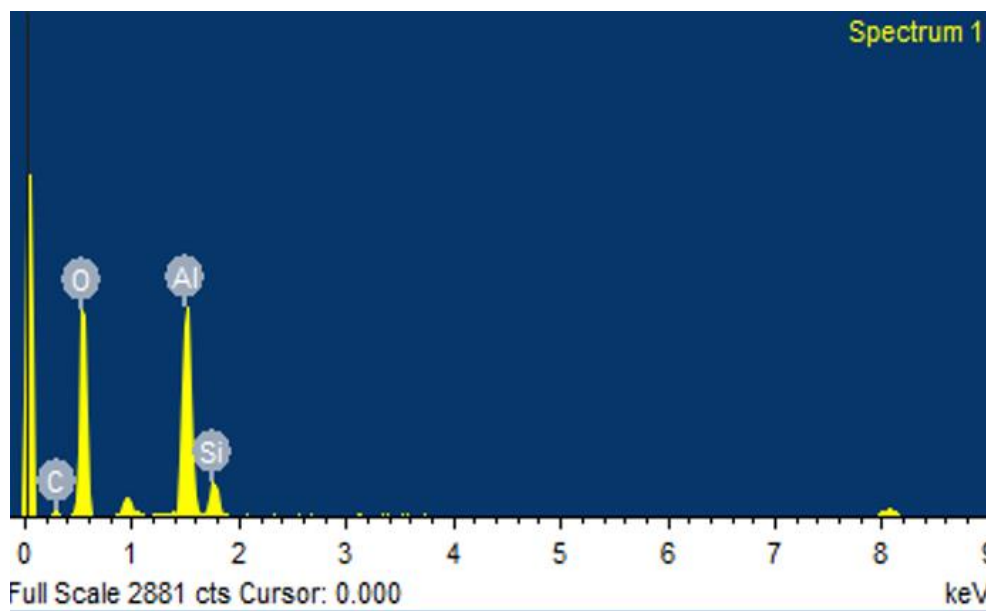

**Figure S6** EDS spectrum of sample S4 containing 40% ZrSiO<sub>4</sub> as reinforcement.

**Table S7** List of elements in AMMC containing 40% ZrSiO<sub>4</sub> as reinforcement.

| Elements | Weight% | Atomic% |
|----------|---------|---------|
| Al       | 26.4    | 17.9    |
| Si       | 1.2     | 0.6     |
| C        | 5.0     | 7.6     |
| O        | 63.8    | 73.0    |
| Zr       | 3.6     | 0.9     |

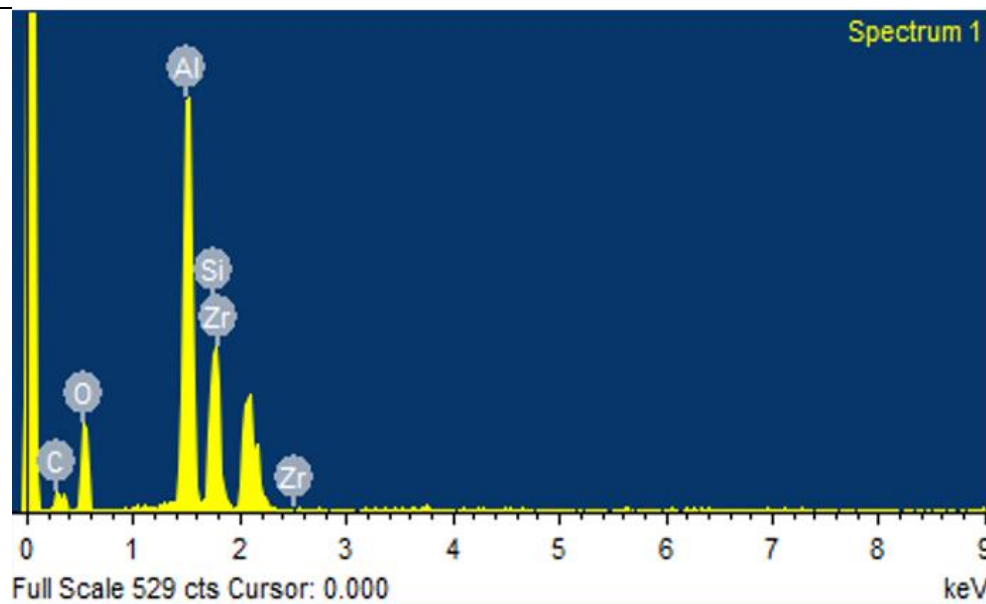

**Figure S7** EDS spectrum of sample H1 containing 20% SiC and 30% ZrSiO<sub>4</sub> as reinforcement.

**Table S8** List of elements in AMMC containing 20% SiC and 30% ZrSiO<sub>4</sub> as reinforcement.

| Elements | Weight% | Atomic% |
|----------|---------|---------|
| Al       | 26.4    | 17.9    |
| Si       | 1.2     | 0.6     |
| C        | 5.0     | 7.6     |
| O        | 63.8    | 73.0    |
| Zr       | 3.6     | 0.9     |

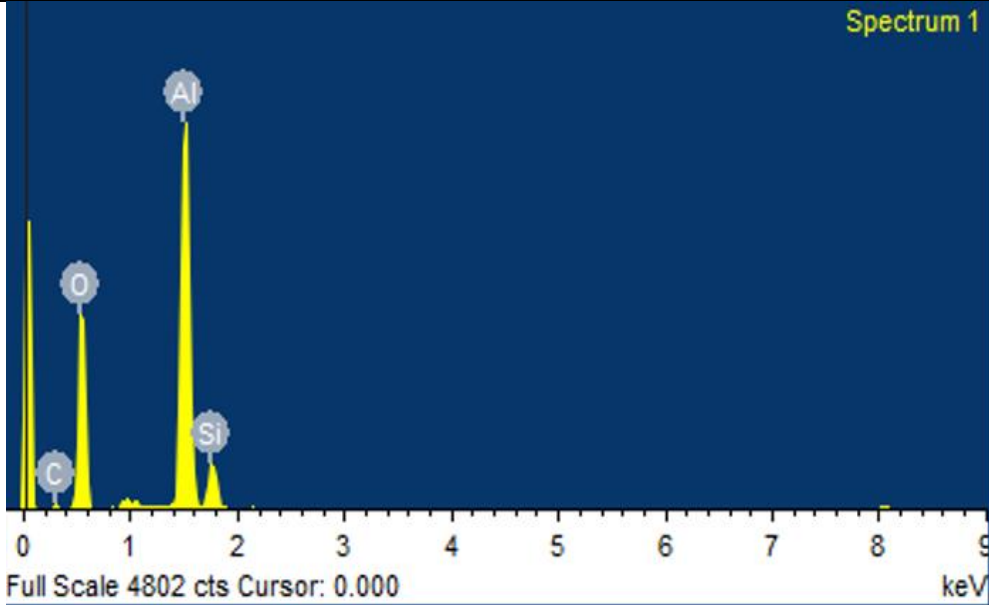

**Figure S8** EDS spectrum of sample containing 30% SiC and 20% ZrSiO<sub>4</sub> as reinforcement.

**Table S9** List of elements in AMMC containing 30% SiC and 20% ZrSiO<sub>4</sub> as reinforcement.

| Elements | Weight% | Atomic% |
|----------|---------|---------|
| Al       | 44.55   | 37.34   |
| Si       | 13.59   | 10.95   |
| C        | 10.86   | 20.31   |
| O        | 20.3    | 28.7    |
| Zr       | 10.7    | 2.7     |

Table 4.20 justify the wt% of Si, C, Zr and O according to the selected wt% of supplements.

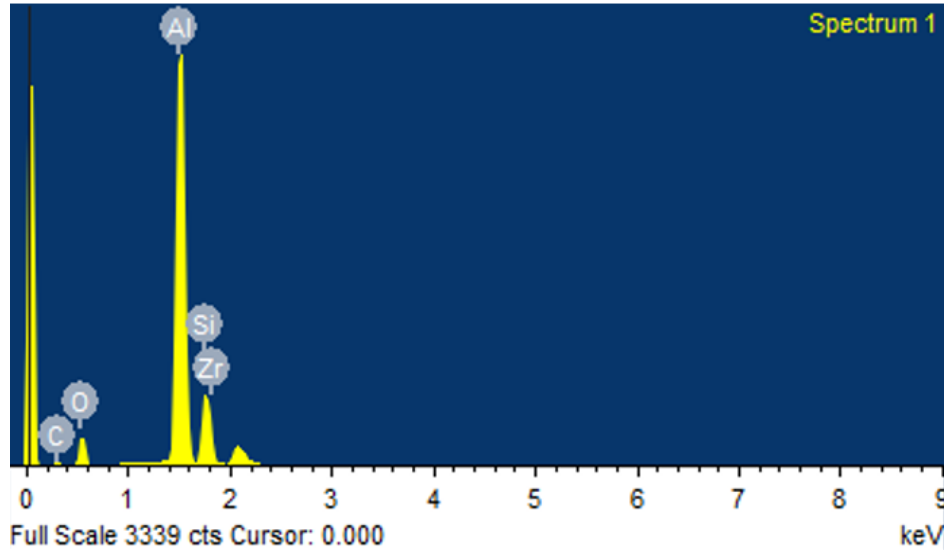

**Figure S9** EDS spectrum of sample containing 40% SiC and 5% ZrSiO<sub>4</sub> as reinforcement.

**Table S10** List of elements in AMMC containing 40% SiC and 5% ZrSiO<sub>4</sub> as reinforcement.

| Elements | Weight% | Atomic% |
|----------|---------|---------|
| Al       | 54.55   | 39.74   |
| Si       | 12.7    | 11.2    |
| Zr       | 3.3     | 2.76    |
| C        | 10.83   | 22.0    |
| O        | 18.62   | 24.3    |
